# Supplementary material for: Inorganic–organic hybrid supramolecular architectures based on Keggin polyoxometalates and crown ether: synthesis, crystal structure and electrochemical properties
Source: Royal Society of Chemistry journal article supplement (doi:10.1039/d1ce01203g), 2021-01-01
Supplement: d1ce01203g1.pdf [file d1ce01203g1.pdf]

## Supporting Information

# Inorganic–Organic Hybrid Supramolecular Architectures Based on Keggin Polyoxometalates and Crown Ether: Synthesis, Crystal Structure and Electrochemical Properties

Jianhang Shi,<sup>‡a</sup> Hongxu Zhang,<sup>‡a</sup> Peisen Wang,<sup>a</sup> Pai Wang,<sup>a</sup> Junjie Zha,<sup>a</sup> Yi Liu,<sup>a</sup> Jagadis Gautam,<sup>a</sup> Lu-Nan Zhang,<sup>a</sup> Yue Wang,<sup>a</sup> Ju Xie,<sup>a</sup> Lubin Ni,<sup>\*a</sup> Guowang Diao,<sup>a</sup> and Yongge Wei<sup>b</sup>

### Contents

|                                                                                                                                                                                    |     |
|------------------------------------------------------------------------------------------------------------------------------------------------------------------------------------|-----|
| <b>Table S1.</b> Selected bond distances for compound <b>1</b> .                                                                                                                   | S2  |
| <b>Table S2.</b> Selected angles for compound <b>1</b> .                                                                                                                           | S3  |
| <b>Table S3.</b> Selected bond distances for compound <b>2</b> .                                                                                                                   | S4  |
| <b>Table S4.</b> Selected angles for compound <b>2</b> .                                                                                                                           | S5  |
| <b>Table S5.</b> Hydrogen bonds (Å and °) in complex <b>1</b> .                                                                                                                    | S6  |
| <b>Table S6.</b> Hydrogen bonds (Å and °) in complex <b>2</b> .                                                                                                                    | S6  |
| <b>Fig S1.</b> Three-dimensional stacking diagram of compound <b>1</b> and <b>2</b> along the <i>a</i> -axis (c) and the <i>b</i> -axis.                                           | S7  |
| <b>Fig S2.</b> X-ray powder patterns of complex <b>1</b> vs. calculated pattern.                                                                                                   | S8  |
| <b>Fig S3.</b> X-ray powder patterns of complex <b>2</b> vs. calculated pattern.                                                                                                   | S8  |
| <b>Fig S4.</b> FT-IR spectra of free H <sub>4</sub> SiMo <sub>12</sub> O <sub>40</sub> (SiMo <sub>12</sub> ), [18]crown-6, and complex <b>1</b> in solid state.                    | S9  |
| <b>Fig S5.</b> FT-IR spectra of free H <sub>4</sub> SiW <sub>12</sub> O <sub>40</sub> (SiW <sub>12</sub> ), [18]crown-6, and complex <b>2</b> in solid state.                      | S9  |
| <b>Fig S6.</b> Raman spectra of free [18]crown-6, free H <sub>4</sub> SiW <sub>12</sub> O <sub>40</sub> (SiW <sub>12</sub> ), and complex <b>2</b> .                               | S10 |
| <b>Fig S7.</b> Thermogravimetric curve of free H <sub>4</sub> SiMo <sub>12</sub> O <sub>40</sub> (SiMo <sub>12</sub> ), [18]crown-6, and complex <b>1</b> .                        | S10 |
| <b>Fig S8.</b> Thermogravimetric curve of free H <sub>4</sub> SiW <sub>12</sub> O <sub>40</sub> (SiW <sub>12</sub> ), [18]crown-6, and complex <b>2</b> .                          | S11 |
| <b>Fig S9.</b> UV/vis spectra of complex <b>1</b> and complex <b>2</b> in aqueous solution.                                                                                        | S11 |
| <b>Fig S10.</b> Solid state UV/vis spectra of complex <b>1</b> and complex <b>2</b> .                                                                                              | S12 |
| <b>Fig S11.</b> Cyclic voltammograms of 0.1 mM aqueous solutions of the free SiMo <sub>12</sub> , SiW <sub>12</sub> , and [18]crown-6 in 0.5 M NaCl/HCl buffer solution at pH 3.0. | S12 |

**Table S1.** Selected bond lengths (Å) for compound **1**.

| <b>Atom</b> | <b>Atom</b>      | <b>Length/Å</b> | <b>Atom</b> | <b>Atom</b>      | <b>Length/Å</b> |
|-------------|------------------|-----------------|-------------|------------------|-----------------|
| Mo1         | O29              | 1.799(6)        | K2          | N1               | 2.874(14)       |
| Mo1         | O31 <sup>a</sup> | 2.400(7)        | K2          | C25              | 3.393(18)       |
| Mo1         | O32 <sup>a</sup> | 1.979(7)        | Si1         | O22 <sup>a</sup> | 1.537(7)        |
| Mo2         | O24              | 2.377(7)        | Si1         | O24 <sup>a</sup> | 1.691(7)        |
| Mo2         | O27              | 1.805(5)        | Si1         | O30              | 1.622(7)        |
| Mo2         | O30 <sup>a</sup> | 2.440(7)        | Si1         | O31 <sup>a</sup> | 1.686(7)        |
| Mo2         | O33              | 1.990(5)        | Si1         | O31              | 1.686(7)        |
| Mo3         | O13              | 1.663(5)        | O1          | C14              | 1.407(9)        |
| Mo4         | O30 <sup>a</sup> | 2.454(7)        | O6          | C13              | 1.400(9)        |
| Mo6         | O19              | 1.997(5)        | O12         | C1               | 1.434(12)       |
| Mo6         | O20              | 1.654(5)        | O12         | C12              | 1.421(13)       |
| Mo6         | O22              | 2.409(7)        | O22         | O30              | 1.694(9)        |
| K1          | O10              | 2.801(6)        | C11         | C12              | 1.499(15)       |
| K1          | O13              | 2.948(5)        | C17         | C18              | 1.470(12)       |
| K1          | C10              | 3.540(9)        | C19         | C20              | 1.474(14)       |
| K2          | O1               | 2.965(6)        | C21         | C22              | 1.457(14)       |
| K2          | O3               | 2.975(6)        | C25         | C26              | 1.54(2)         |

Symmetry transformation for **1**:  $a, -x, 1-y, 1-z$

**Table S2.** Selected angles (°) for compound **1**.

| Atom | Atom | Atom             | Angle/°    | Atom             | Atom | Atom             | Angle/°   |
|------|------|------------------|------------|------------------|------|------------------|-----------|
| O25  | Mo2  | O33              | 98.2(3)    | O22 <sup>1</sup> | Si1  | O24              | 110.9(3)  |
| O27  | Mo2  | O16              | 87.4(2)    | O22              | Si1  | O30 <sup>a</sup> | 115.2(3)  |
| O27  | Mo2  | O24              | 65.1(3)    | O22 <sup>a</sup> | Si1  | O30 <sup>a</sup> | 64.8(3)   |
| O34  | Mo4  | O21              | 103.2(4)   | C6               | O9   | C7               | 116.3(11) |
| O34  | Mo4  | O23 <sup>a</sup> | 97.2(3)    | C7               | O9   | K1               | 116.7(7)  |
| O34  | Mo4  | O29 <sup>a</sup> | 97.7(3)    | C8               | O10  | K1               | 116.7(6)  |
| O34  | Mo4  | O30 <sup>a</sup> | 154.7(2)   | C9               | O10  | K1               | 116.9(6)  |
| O34  | Mo4  | O31              | 155.1(3)   | C9               | O10  | C8               | 114.3(9)  |
| O12  | K1   | O13              | 93.6(2)    | O1               | C14  | C13              | 109.5(6)  |
| O12  | K1   | C10              | 79.8(2)    | O6               | C15  | C16              | 110.0(6)  |
| O13  | K1   | C10              | 69.20(19)  | O5               | C16  | C15              | 108.3(7)  |
| O1   | K2   | O3               | 106.35(17) | O5               | C17  | C18              | 109.5(7)  |
| O3   | K2   | O25              | 126.08(16) | O1               | C24  | C23              | 109.2(8)  |
| O3   | K2   | C25              | 80.7(3)    | N1               | C25  | K2               | 53.6(11)  |
| O4   | K2   | O1               | 146.63(17) | N1               | C25  | C26              | 169(2)    |
| O4   | K2   | O2               | 114.23(18) | C26              | C25  | K2               | 137.5(12) |

Symmetry transformation for **1**:  $a, -x, l-y, l-z$

**Table S3.** Selected bond lengths (Å) for compound **2**.

| Atom            | Atom | Length/Å  | Atom            | Atom             | Length/Å  |
|-----------------|------|-----------|-----------------|------------------|-----------|
| W1              | O1   | 1.679(6)  | K1              | O24              | 2.840(7)  |
| W1 <sup>a</sup> | O9   | 1.868(8)  | K1              | N1               | 2.828(17) |
| W1 <sup>a</sup> | O10  | 1.901(6)  | K1              | C25              | 3.42(2)   |
| W2              | O18  | 1.905(7)  | Si1             | O20 <sup>a</sup> | 1.605(9)  |
| W2              | O19  | 2.313(10) | Si1             | O19              | 1.685(9)  |
| W3              | O20  | 2.454(10) | O23             | C15              | 1.419(13) |
| W4              | O8   | 1.905(6)  | O24             | C13              | 1.413(13) |
| W5              | O11  | 1.671(6)  | C15             | C16              | 1.482(15) |
| W5              | O12  | 1.872(8)  | C17             | C18              | 1.470(15) |
| W5              | O17  | 1.916(7)  | K2 <sup>b</sup> | O5               | 2.946(9)  |
| W6              | O19  | 2.404(11) | K2              | O32              | 2.800(8)  |
| W6              | O18  | 1.960(13) | O29             | C7               | 1.40(2)   |
| W6              | O3   | 1.776(10) | O30             | C8               | 1.391(19) |
| W6              | O2   | 1.676(7)  | O30             | C9               | 1.406(19) |
| K1              | O1   | 3.062(7)  | C5              | C6               | 1.53(2)   |
| K1              | O21  | 2.965(8)  | C7              | C8               | 1.45(2)   |
| K1              | O22  | 2.807(7)  | C9              | C10              | 1.48(2)   |
| K1              | O23  | 2.855(7)  | C11             | C12              | 1.46(2)   |

Symmetry transformation for **2**: a,  $l-x, l-y, l-z$ ; b,  $l-x, l-y, -z$ .

**Table S4.** Selected angles (°) for compound **2**.

| Atom            | Atom            | Atom             | Angle/°   | Atom | Atom | Atom | Angle/°   |
|-----------------|-----------------|------------------|-----------|------|------|------|-----------|
| O1              | W1              | O10 <sup>a</sup> | 100.9(4)  | O28  | K2   | O30  | 118.7(3)  |
| O4              | W1              | O19              | 61.4(4)   | O28  | K2   | O31  | 159.2(3)  |
| O4              | W1              | O20 <sup>a</sup> | 96.1(4)   | O31  | C11  | C12  | 110.6(14) |
| O9 <sup>a</sup> | W1              | O3               | 89.0(4)   | O32  | C12  | C11  | 108.7(13) |
| O9 <sup>a</sup> | W1              | O4               | 158.2(4)  | C18  | O21  | K1   | 108.3(6)  |
| O7              | W6 <sup>a</sup> | O19 <sup>a</sup> | 93.5(4)   | C18  | O21  | C19  | 113.1(9)  |
| O7              | W6 <sup>a</sup> | O18 <sup>a</sup> | 158.3(4)  | C19  | O21  | K1   | 110.7(7)  |
| O19             | Si1             | O19 <sup>a</sup> | 104.8(5)  | C16  | O22  | K1   | 119.9(6)  |
| O20             | Si1             | O19              | 69.3(5)   | C17  | O22  | K1   | 122.6(6)  |
| O19             | Si1             | O20 <sup>a</sup> | 110.8(5)  | C17  | O22  | C16  | 110.8(8)  |
| K2 <sup>b</sup> | O5              | W2               | 166.9(4)  | C14  | O23  | K1   | 108.9(6)  |
| C13             | O24             | K1               | 117.7(6)  | C15  | O23  | K1   | 109.3(6)  |
| C15             | O23             | C14              | 111.0(8)  | O29  | C6   | C5   | 106.7(13) |
| O27             | C3              | C4               | 107.3(11) | O29  | C7   | C8   | 110.7(14) |

Symmetry transformation for **2**: *a*, *l*-*x*, *l*-*y*, *l*-*z*; *b*, *l*-*x*, *l*-*y*, -*z*.

**Table S5.** Hydrogen bonds (Å and °) in complex 1.

| D-H...A        | d(D-H) | d(H...A) | d(D...A) | ∠ DHA  | Symmetry Code                                    |
|----------------|--------|----------|----------|--------|--------------------------------------------------|
| C9-H9B...O1    | 0.970  | 2.698    | 3.549    | 146.76 | $1+x, -1+y, z;$<br>$1/2+x, 1/2-y, -1/2+z$        |
| C23-H23B...O23 | 0.970  | 2.546    | 3.439    | 152.96 | $1+x, -1+y, z;$<br>$1/2+x, 1/2-y, -1/2+z$        |
| C22-H22A...O29 | 0.970  | 2.504    | 3.387    | 151.18 | $1/2+x, 1/2-y, -1/2+z;$<br>$1+x, -1+y, z$        |
| C10-H10B...O18 | 0.970  | 2.623    | 3.320    | 128.95 | $1-x, -y, 1-z;$<br>$1+x, -1+y, 1+z$              |
| C10-H9A...O18  | 0.970  | 3.341    | 3.793    | 110.62 | $1-x, -y, 1-z;$<br>$1+x, -1+y, 1+z$              |
| C1-H1A...N1    | 0.970  | 2.626    | 3.533    | 155.83 | $1/2+x, 1/2-y, 1/2+z;$<br>$1/2+x, 1/2-y, -1/2+z$ |

**Table S6.** Hydrogen bonds (Å and °) in complex 2.

| D-H...A        | d(D-H) | d(H...A) | d(D...A) | ∠ DHA  | Symmetry Code                              |
|----------------|--------|----------|----------|--------|--------------------------------------------|
| C13-H13B...O12 | 0.970  | 2.624    | 3.375    | 134.47 | $x, y, z;$<br>$-1+x, y, z$                 |
| C20-H20A...O13 | 0.970  | 2.541    | 3.464    | 159    | $1-x, 1-y, 1-z;$<br>$1/2-x, -1/2+y, 1/2-z$ |
| C21-H21A...O17 | 0.970  | 2.464    | 3.365    | 154.45 | $1-x, 1-y, 1-z;$<br>$1/2-x, -1/2+y, 1/2-z$ |
| C2-H2A...O6    | 0.970  | 2.608    | 3.321    | 130.59 | $x, y, z;$<br>$1-x, 1-y, -z$               |
| C26-H26B...O27 | 0.962  | 2.469    | 3.318    | 146.97 | $x, y, z;$<br>$x, y, -1+z$                 |
| C5-H5B...N1    | 0.969  | 2.676    | 3.589    | 157.29 | $x, y, z;$<br>$x, y, -1+z;$                |

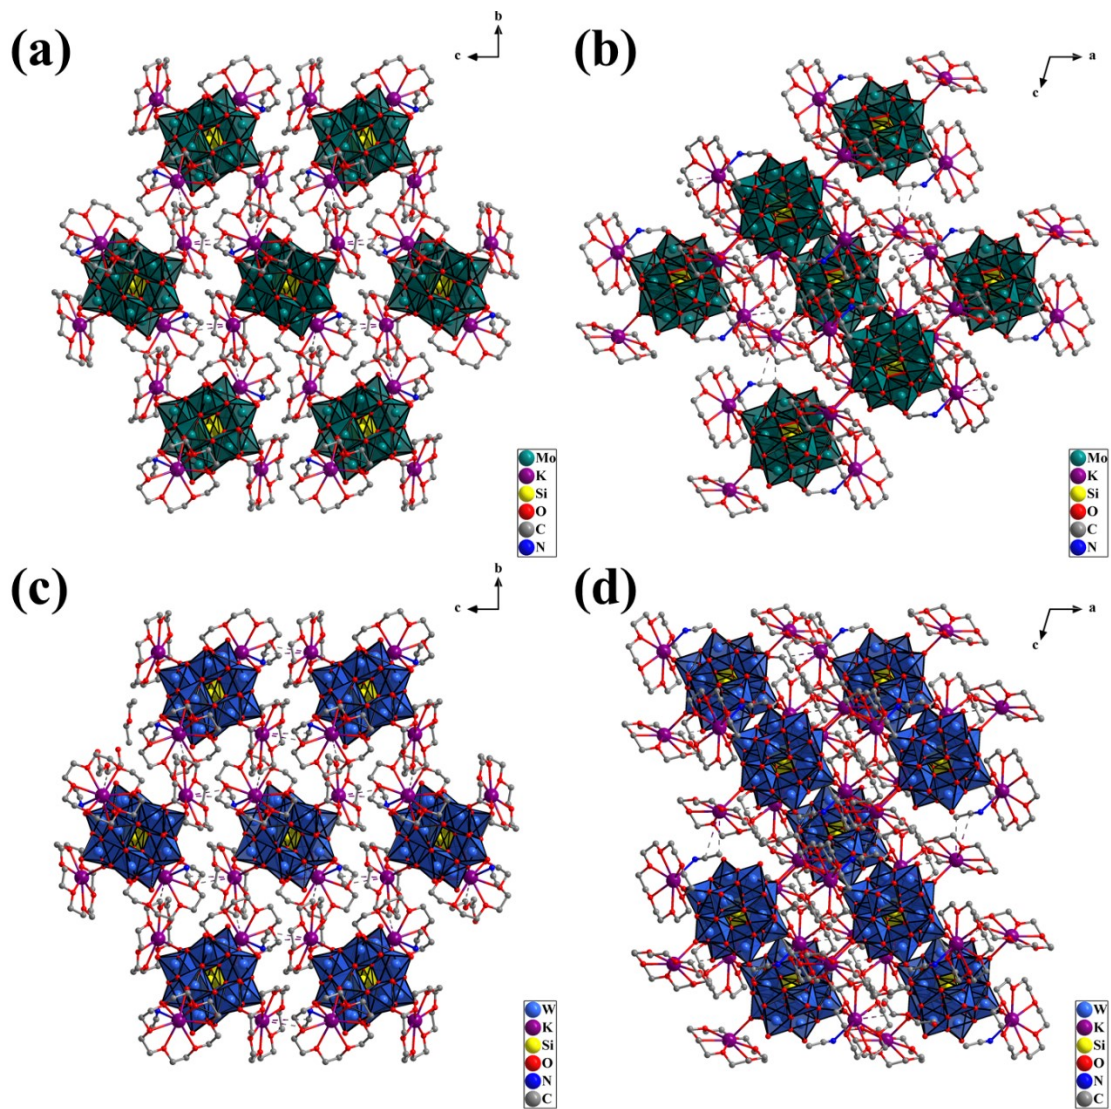

**Fig S1.** Three-dimensional stacking diagram of compound **1** along the  $a$ -axis (a) and the  $b$ -axis (b) and compound **2** along the  $a$ -axis (c) and the  $b$ -axis (d).

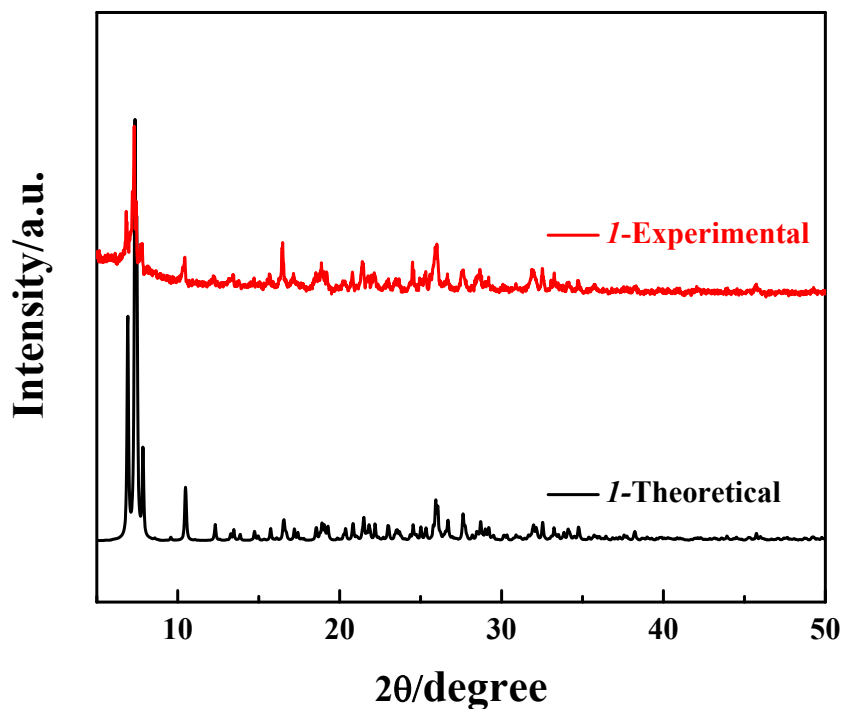

**Fig S2.** X-ray powder pattern of complex **1** vs. the calculated pattern. Peak positions are in good agreement, indicating the phase purity of the compound. Differences in intensity are due to preferred orientation of the powder sample.

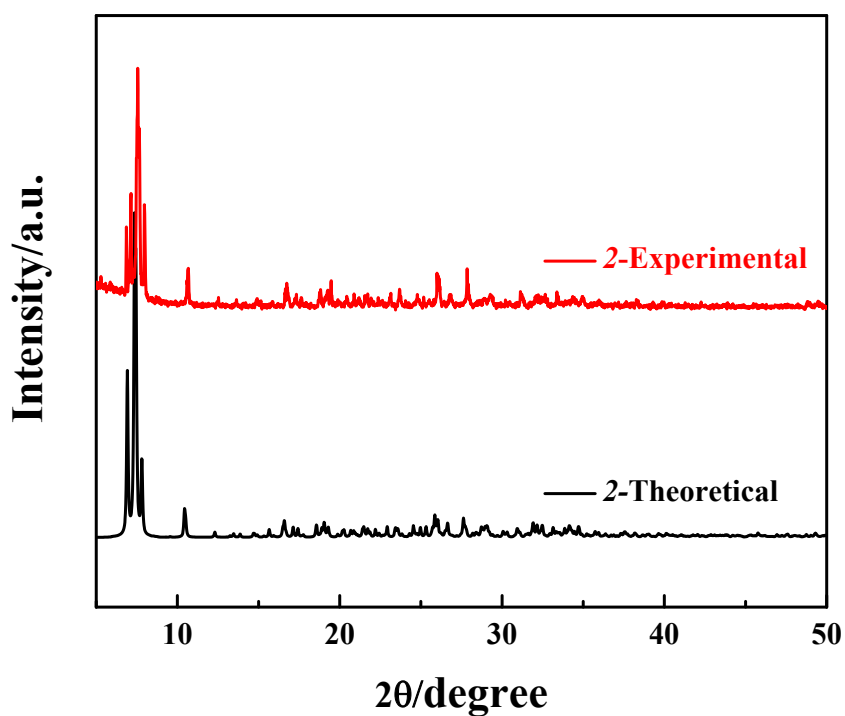

**Fig S3.** X-ray powder pattern of complex **2** vs. the calculated pattern. Peak positions are in good agreement, indicating the phase purity of the compound. Differences in intensity are due to preferred orientation of the powder sample.



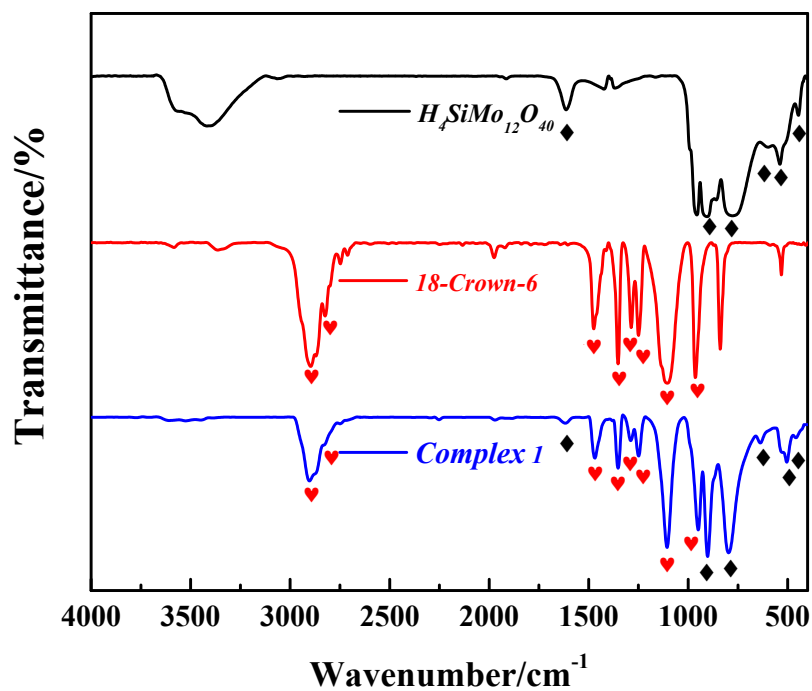

Fig S4. FT-IR spectra of free  $H_4SiMo_{12}O_{40}$  ( $SiMo_{12}$ ), [18]crown-6, and complex 1 in solid state.

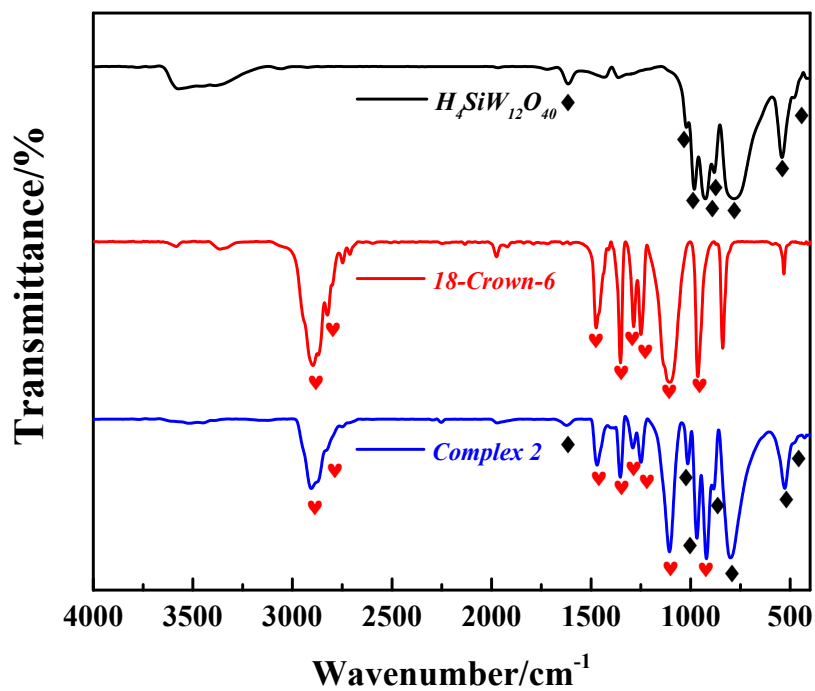

Fig S5. FT-IR spectra of free  $H_4SiW_{12}O_{40}$  ( $SiW_{12}$ ), [18]crown-6, and complex 2 in solid state.

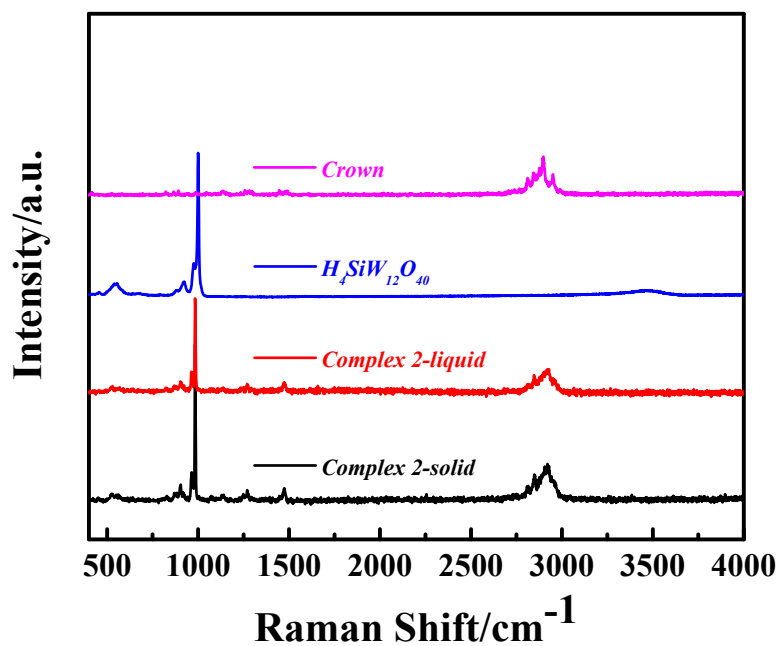

**Fig S6.** Raman spectra of free [18]crown-6, free  $H_4SiW_{12}O_{40}$  ( $SiW_{12}$ ), and complex 2 in solid state/aqueous solution.

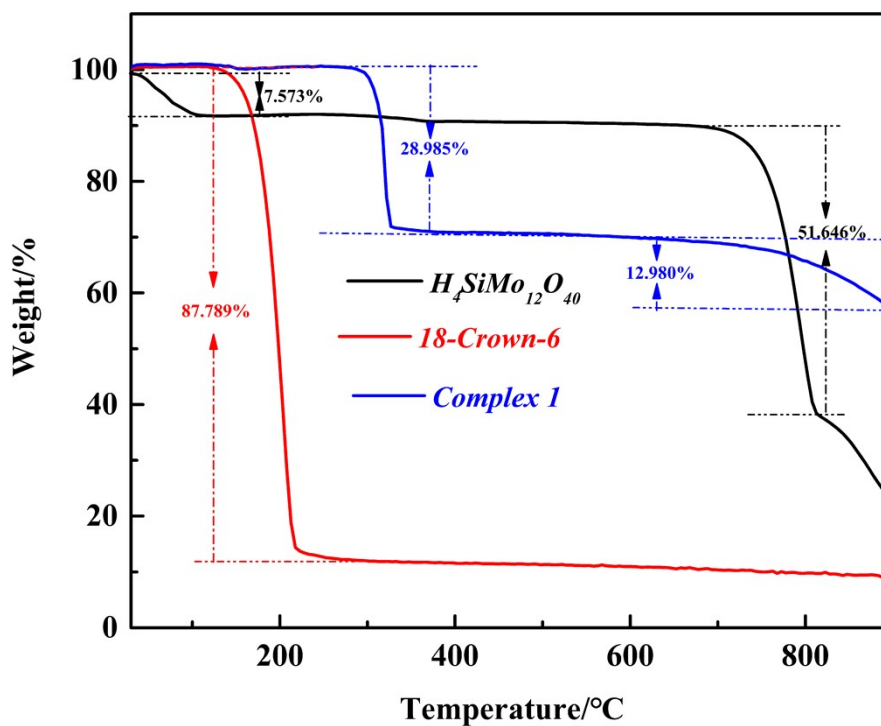

**Fig S7.** Thermogravimetric curve of free  $H_4SiMo_{12}O_{40}$  ( $SiMo_{12}$ ), [18]crown-6, and complex 1.

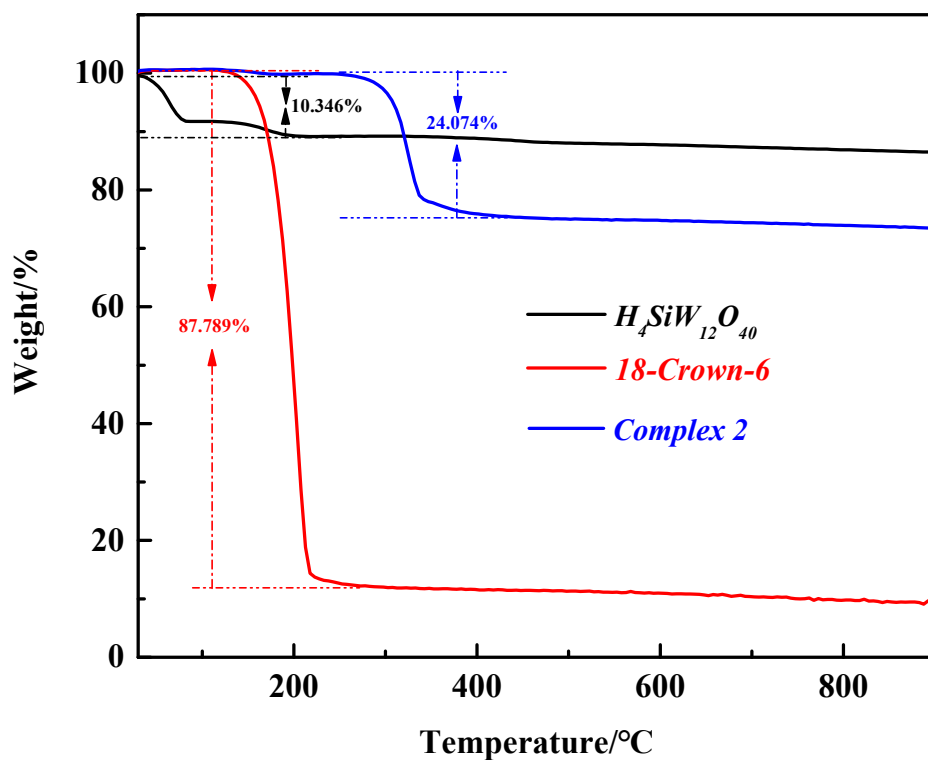

Fig S8. Thermogravimetric curve of free  $H_4SiW_{12}O_{40}$  ( $SiW_{12}$ ), [18]crown-6, and complex 2.

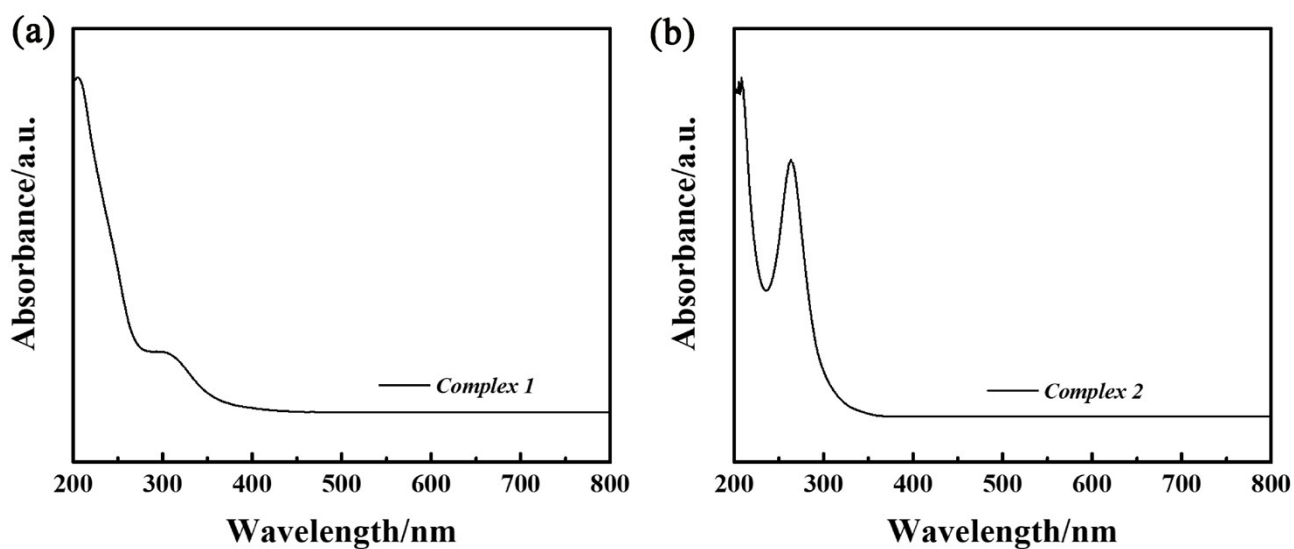

Fig S9. UV/vis spectra of (a) complex 1 and (b) complex 2 in aqueous solution.

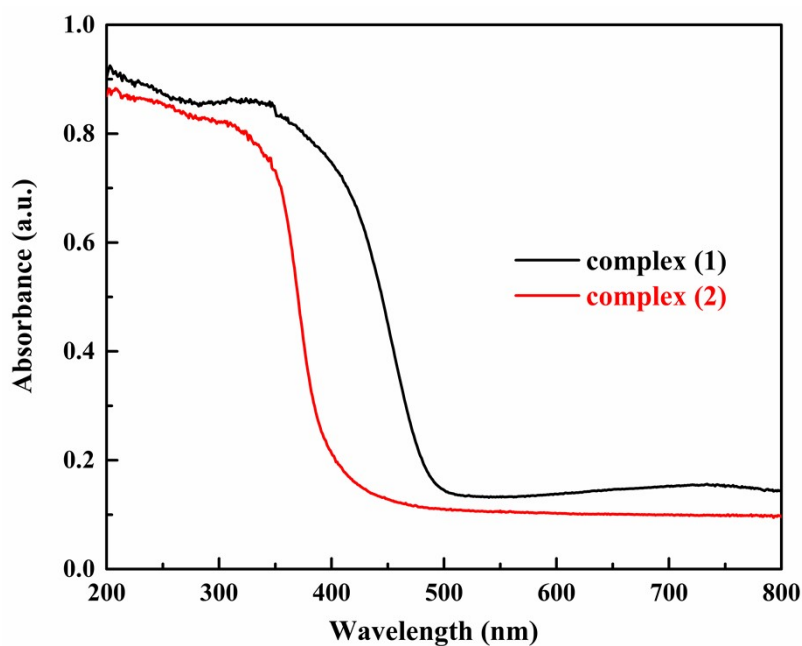

**Fig S10.** Solid state UV/vis spectra of complex **1** and complex **2**. (Band gap:  $E_g$  (eV) =  $hc / \lambda \approx 1240 / \lambda_{\text{onset}}$ ,  $h$  Planck's constant;  $c$  the speed of light in vacuum.)

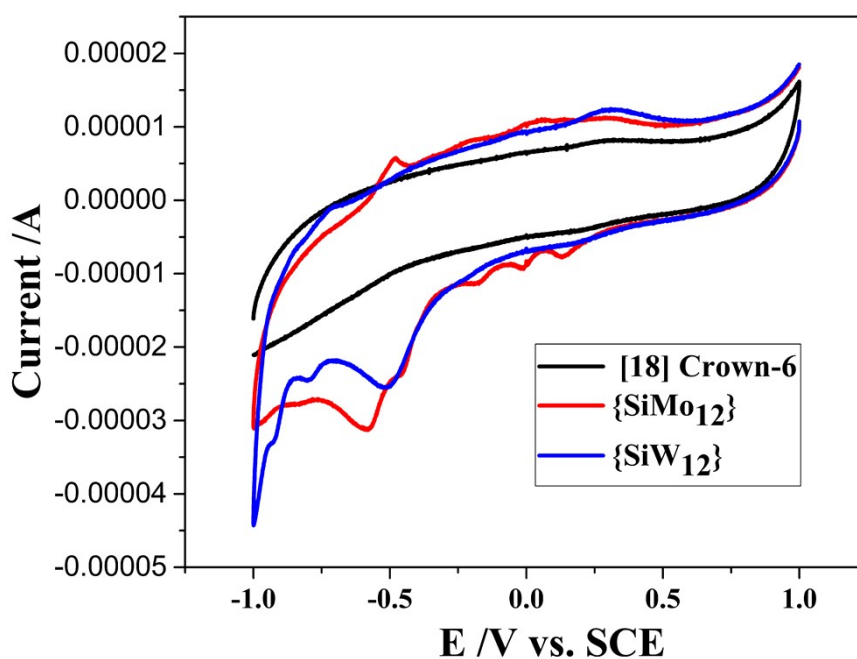

**Fig S11.** Cyclic voltammograms of 0.1 mM aqueous solutions of the free  $\text{H}_4\text{SiMo}_{12}\text{O}_{40}$  ( $\text{SiMo}_{12}$ ),  $\text{H}_4\text{SiW}_{12}\text{O}_{40}$  ( $\text{SiW}_{12}$ ), and [18]crown-6 in 0.5 M NaCl/HCl buffer solution at pH 3.0. (scan rate 100 mV/s, GCE working electrode, SCE reference electrode.)
